# Supplementary material for: Genomic Insights into Syntrophic Lifestyle of ‘Candidatus Contubernalis alkaliaceticus’ Based on the Reversed Wood–Ljungdahl Pathway and Mechanism of Direct Electron Transfer
Source: MDPI journal article supplement (doi:10.3390/life13102084), 2023-10-20
Supplement: s1 [file s1]

*Supplementary Material*

**Genomic insights into the carbon and energy metabolism of an obligately syntrophic  
alkaliphilic bacterium ‘*Candidatus Contubernalis alkalaceticum*’**

Evgenii N. Frolov<sup>1</sup>, Sergey N. Gavrilov<sup>1</sup>, Stepan V. Toshchakov<sup>2</sup>, Daria G. Zavarzina<sup>1</sup>

<sup>1</sup>Winogradsky Institute of Microbiology, Federal Research Center of Biotechnology, Russian Academy of Sciences, 60 let Oktjabrja pr-t, 7, bld. 2, 117312 Moscow, Russia

<sup>2</sup>National Research Centre “Kurchatov Institute”, Akademika Kurchatova Sq., 1, 123182 Moscow, Russia

These authors contributed equally to this work.

*Corresponding author: evgenii\_frolov\_89@mail.ru*

**Table S1.** Genome and environmental features of ‘*Ca. C. alkalaceticum*’.

| FEATURE                         | DESCRIPTION                                                                                                                                                                                                                                        |
|---------------------------------|----------------------------------------------------------------------------------------------------------------------------------------------------------------------------------------------------------------------------------------------------|
| NCBI taxonomy                   | Domain <i>Bacteria</i><br>Phylum <i>Firmicutes</i><br>Class <i>Clostridia</i><br>Order <i>Clostridiales</i><br>Family <i>Syntrophomonadaceae</i><br>Genus <i>Candidatus Contubernalis</i><br>Species <i>Candidatus Contubernalis alkalaceticum</i> |
| GTDB taxonomy*                  | Type strain Z7904 <sup>T</sup><br>Domain <i>Bacteria</i><br>Phylum <i>Firmicutes_D</i><br>Class <i>Dethiobacteria</i><br>Order ND**<br>Family ND**<br>Genus ND**<br>Species ND**                                                                   |
| Biosample ref                   | SAMN15165809 (NCBI)                                                                                                                                                                                                                                |
| Collection date                 | August 1997                                                                                                                                                                                                                                        |
| Geographical location name      | Russia, Tyva Republic, Khadyn soda lake                                                                                                                                                                                                            |
| Geographical coordinates        | 51.358096 N, 94.517211 E                                                                                                                                                                                                                           |
| Sequencing project ref          | PRJNA638041 (NCBI)                                                                                                                                                                                                                                 |
| Sequencing method               | Illumina MiSeq, Oxford Nanopore GridION                                                                                                                                                                                                            |
| Sequencing center               | NRC “Kurchatov Institute”                                                                                                                                                                                                                          |
| Assembly method                 | Unicycler v.0.4.8; CLC Genomics Workbench v.10.0                                                                                                                                                                                                   |
| Coverage                        | 89x (Illumina), 170x (Oxford Nanopore)                                                                                                                                                                                                             |
| Number of replicons             | 1                                                                                                                                                                                                                                                  |
| Finishing level                 | Finished                                                                                                                                                                                                                                           |
| Genome size, bp                 | 3558951                                                                                                                                                                                                                                            |
| GC content, %                   | 41.2                                                                                                                                                                                                                                               |
| Genes                           | 3516                                                                                                                                                                                                                                               |
| Pseudogenes                     | 65                                                                                                                                                                                                                                                 |
| RNA genes                       | 68                                                                                                                                                                                                                                                 |
| rRNA                            | 13 (4 operons and one isolated 5S rRNA)                                                                                                                                                                                                            |
| tRNA                            | 51                                                                                                                                                                                                                                                 |
| ncRNA                           | 4                                                                                                                                                                                                                                                  |
| GI number                       | 19                                                                                                                                                                                                                                                 |
| GI length (% share)             | 414209 (11.6)                                                                                                                                                                                                                                      |
| GI gene number (% share)        | 494 (14.05)                                                                                                                                                                                                                                        |
| Mobile elements (IS)            | 89                                                                                                                                                                                                                                                 |
| complete IS-related             | 62                                                                                                                                                                                                                                                 |
| ORFs                            |                                                                                                                                                                                                                                                    |
| partial ORFs                    | 5                                                                                                                                                                                                                                                  |
| pseudogene ORFs                 | 9                                                                                                                                                                                                                                                  |
| unknown                         | 48                                                                                                                                                                                                                                                 |
| Number of different IS families | 36                                                                                                                                                                                                                                                 |
| Prophage regions                | 5                                                                                                                                                                                                                                                  |
| intact                          | 2                                                                                                                                                                                                                                                  |
| partial                         | 3                                                                                                                                                                                                                                                  |
| total length (kb)               | 108.9                                                                                                                                                                                                                                              |

**Table S2.** Structure of CRISPR-Cas locus of ‘*Ca. C. alkalaceticum*’.

| LOCUS TAG   | GENE                                                             | CDD<br>database | SYSTEM<br>TYPE<br>(SUBTYPE) | STRAND | BEST BLASTP HIT (NR)                          | IDENTITY | E-<br>VALUE | ACC            |
|-------------|------------------------------------------------------------------|-----------------|-----------------------------|--------|-----------------------------------------------|----------|-------------|----------------|
| HUE98_14325 | TIGR02710 family CRISPR-associated protein                       | cd09747         | III                         | -      | <i>Syntrophomonadaceae<br/>bacterium</i>      | 50%      | 1e-153      | NLC07785.1     |
| HUE98_14330 | type III-B CRISPR module RAMP protein Cmr6                       | cd09661         | III-B                       | -      | <i>Desulfosporosinus</i> sp. Tol-M            | 43%      | 3e-108      | KGP75449.1     |
| HUE98_14335 | type III-B CRISPR module RAMP protein Cmr5                       | cd09749         | III-B                       | -      | <i>Desulfosporosinus</i> sp.<br>BRH_c37       | 50%      | 6e-29       | KUO70795.1     |
| HUE98_14350 | type III-B CRISPR module RAMP protein Cmr4                       | COG1336         | III-C                       | -      | <i>Bacillus alveayuensis</i>                  | 61%      | 3e-123      | WP_044895091.1 |
| HUE98_14355 | type III-B CRISPR module-associated protein<br>Cmr3              | pfam09700       | III-B                       | -      | <i>Bacillus</i> sp. HMF5848                   | 49%      | 2e-125      | WP_125905557.1 |
| HUE98_14360 | type III-B CRISPR-associated protein<br>Cas10/Cmr2               | cd09679         | III                         | -      | <i>Bacillus</i> sp. HMF5848                   | 44%      | 3e-159      | WP_125905556   |
| HUE98_14365 | type III-B CRISPR module RAMP protein Cmr1                       | COG1367         | III-B                       | -      | <i>Bacillus</i> sp. HMF5848                   | 44%      | 2e-77       | WP_125905555.1 |
| HUE98_14370 | CRISPR-associated endonuclease Cas2                              | cd09725         | I,II,III,V                  | -      | <i>Pelotomaculum</i> sp.<br>PtaB.Bin104       | 74%      | 5e-39       | OPX90215.1     |
| HUE98_14375 | type I-B CRISPR-associated endonuclease Cas1                     | cd09722         | I-B                         | -      | <i>Thermincola</i>                            | 68%      | 4e-167      | WP_013121320.1 |
| HUE98_14380 | CRISPR-associated protein Cas4, pseudogene<br>with internal stop | pfam01930       | I                           | -      | <i>Firmicutes bacterium</i>                   | 59%      | 8e-68       | HHU51258.1     |
| HUE98_14385 | CRISPR-associated helicase Cas3'                                 | COG1203         | I                           | -      | <i>Firmicutes bacterium</i>                   | 43%      | 0           | MTI85228.1     |
| HUE98_14390 | CRISPR-associated protein Cas5                                   | cd09692         | I-B                         | -      | <i>Firmicutes bacterium</i>                   | 59%      | 7e-97       | MTI85229.1     |
| HUE98_14395 | type I CRISPR-associated protein Cas7b                           | pfam05107       | I-B/I-C                     | -      | <i>Firmicutes bacterium</i>                   | 65%      | 1e-154      | MTI85230       |
| HUE98_14400 | hypothetical CRISPR-associated protein TM1802                    | cl21533         | I-A/I-B                     | -      | <i>Firmicutes bacterium</i>                   | 43%      | 0           | MTI85231.1     |
| HUE98_14405 | CRISPR-associated endoribonuclease Cas6                          | COG1583         | I,III,IV                    | -      | <i>Firmicutes bacterium</i>                   | 58%      | 1e-100      | HHY36210.1     |
| HUE98_14410 | CRISPR-associated protein Csm6                                   | cd09742         | III-A                       | -      | <i>Desulfofundulus<br/>thermosubterraneus</i> | 54%      | 1e-142      | WP_072868410   |

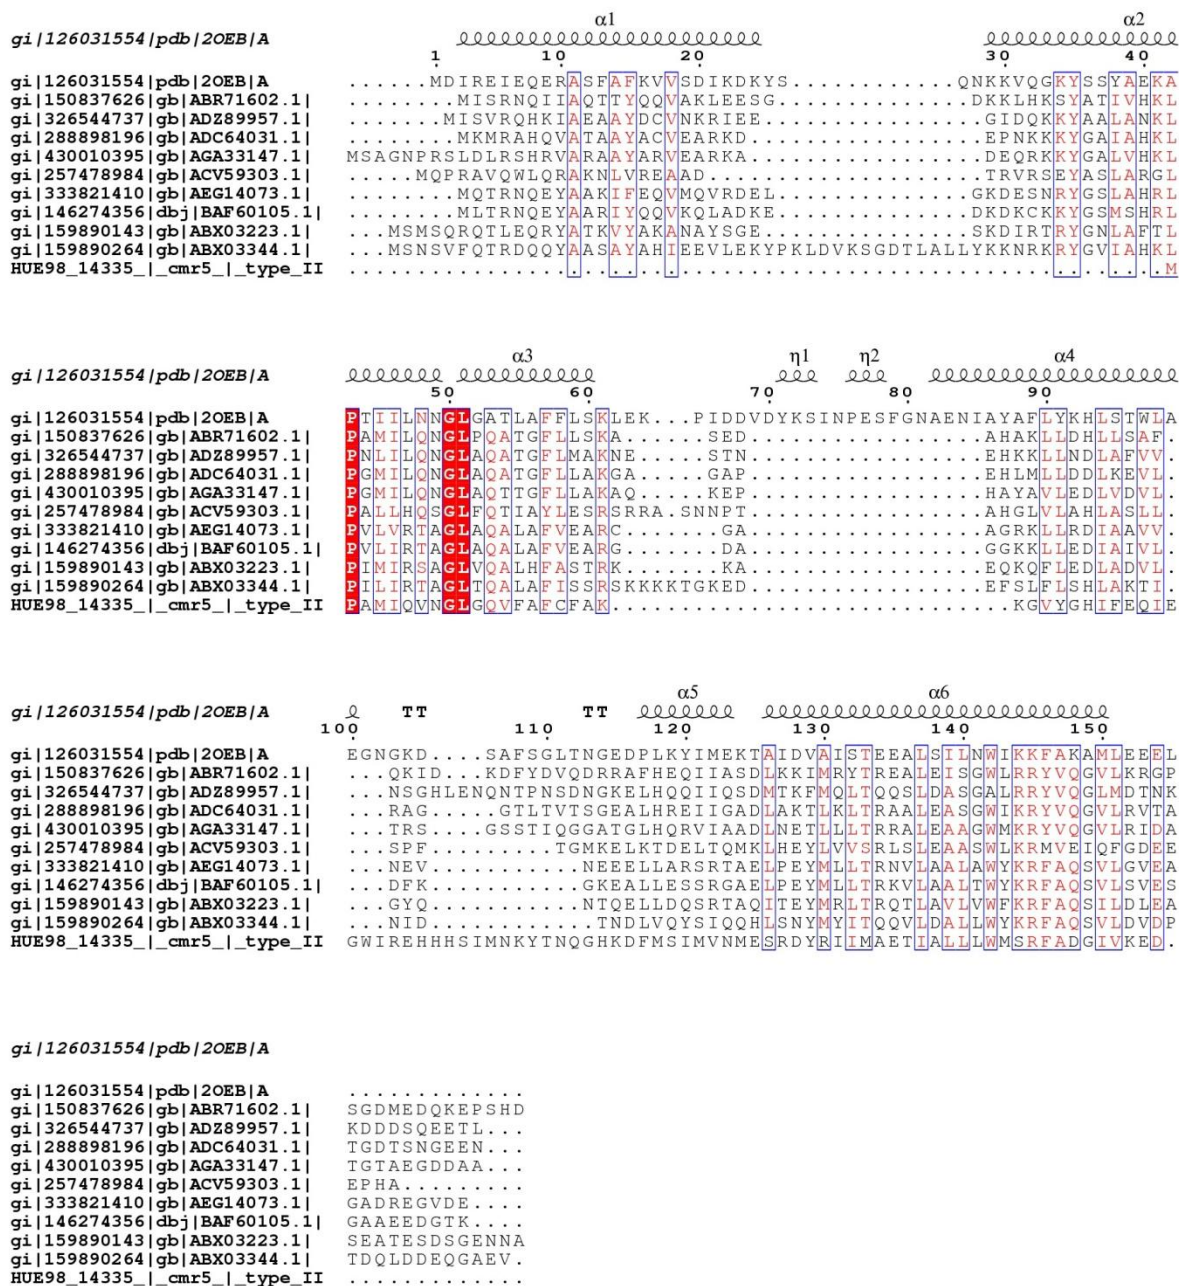

**Figure S1.** Sequence alignment of CRISPR -associated proteins Cmr5 and the subunit Cmr5 (HUE98\_14335) of ‘*Ca. C. alkalaceticum*’.
